# Supplementary material for: Using UPLC-MS/MS for Characterization of Active Components in Extracts of Yupingfeng and Application to a Comparative Pharmacokinetic Study in Rat Plasma after Oral Administration
Source: MDPI journal article supplement (doi:10.3390/molecules22050810), 2017-05-17
Supplement: s1 [file s1]

**Supplementary Materials:** The following are available online at [www.mdpi.com/link](http://www.mdpi.com/link).

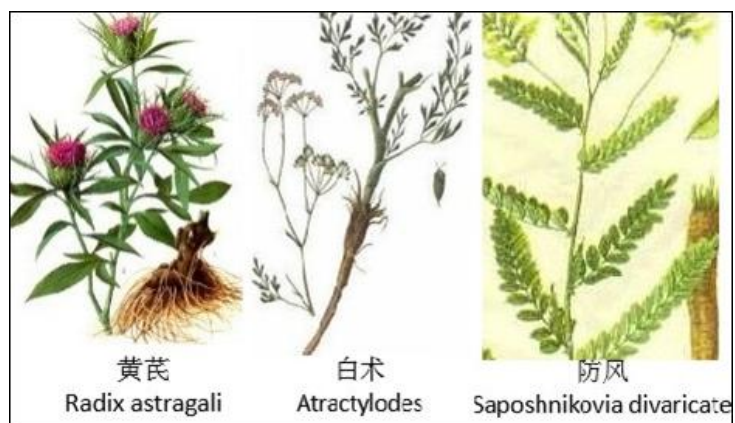

**Figure S1.** Medicinal plants of YPF.

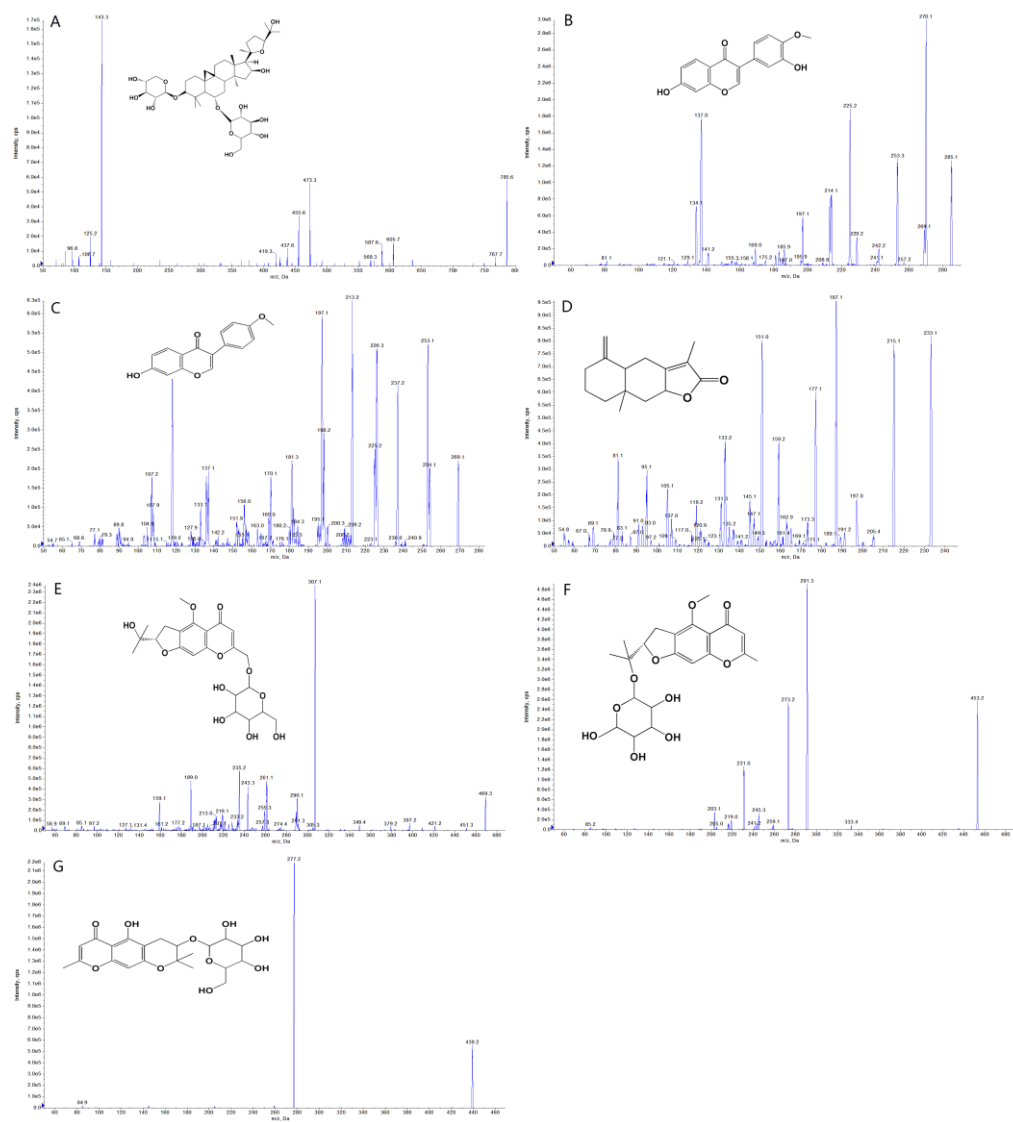

**Figure S2.** Full-scan product ion spectra of: (A) Astragaloside; (B) Calycosin; (C) Formononetin; (D) Atractylenolide II; (E) Cimicifugoside; (F) 4-O-beta-D-glucosyl-5-O-methylvisamminol; and (G) Sec-O-Glucosylhamaudol

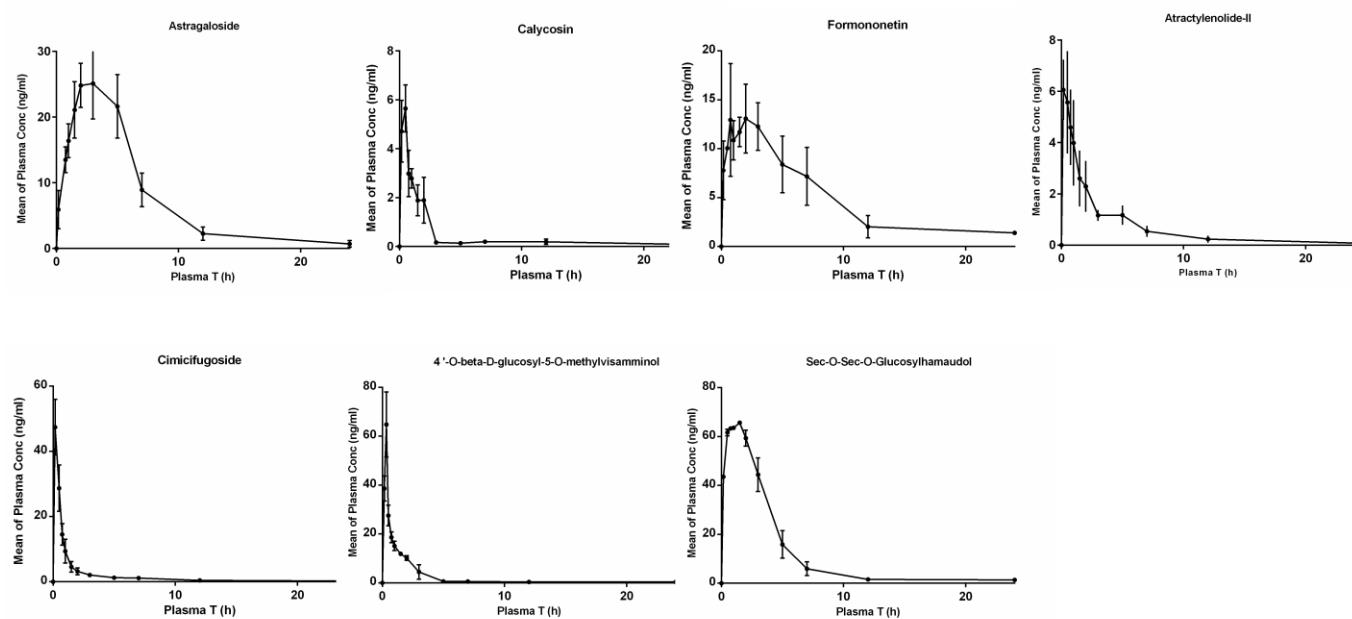

**Figure S3.** Mean plasma concentration–time curves for: (A) Astragaloside; (B) Calycosin; (C) Formononetin; (D) Atractylenolide II; (E) Cimicifugoside; (F) 4-*O*-beta-D-glucosyl-5-*O*-methylvisamminol; and (G) Sec-*O*-Glucosylhamaudol from a normal rat after oral administration of mix-std
